# Supplementary material for: Understanding Menstrual Irregularities in Adolescents: Key Factors and Their Role in Achieving Sustainable Development Goals
Source: Research Square preprint supplement (doi:10.21203/rs.3.rs-5538953/v1), 2025-04-23
Supplement: Supplementary file 1 [file 8582a867dd03dcabc3d70007.docx]

**MODIFIED QUALITATIVE *FOOD FREQUENCY* QUESTIONNAIRE**

Respondent Name:

Respondent No. :

Instructions: food habits in the past month, put a mark (x) on the available points!

| Food Ingredient Name | Frequency | | | |
| --- | --- | --- | --- | --- |
| Often | | Rarely/never | |
| >1 x/day | 4- 6x/week | < 1- 3 x/mg | Never |
| **Carbohydrate Source** | | | | |
| Rice |  |  |  |  |
| Cassava |  |  |  |  |
| Sweet potato |  |  |  |  |
| Bread |  |  |  |  |
| Noodles |  |  |  |  |
| Syrup/sweet drink |  |  |  |  |
| **Protein Source** | | | | |
| Beef |  |  |  |  |
| Chicken meat |  |  |  |  |
| Mutton |  |  |  |  |
| Chicken egg |  |  |  |  |
| Fresh fish |  |  |  |  |
| Tempe/tofu |  |  |  |  |
| Nuts |  |  |  |  |
| **Fat Source** | | | | |
| Full cream Milk |  |  |  |  |
| Vegetable oil |  |  |  |  |
| Offal |  |  |  |  |
| Cheese |  |  |  |  |
| Butter |  |  |  |  |
| Coconut milk |  |  |  |  |
| **Prepared Food/Snacks** | | | | |
| Fast food |  |  |  |  |
| Soft drink |  |  |  |  |
| Fried foods |  |  |  |  |
| **Fiber source** | | | | |
| Vegetables |  |  |  |  |
| Fruits |  |  |  |  |

Description. Validated questionnaire and available from: <https://lib.ui.ac.id/file?file=digital/old11/124734-S-5648-Hubungan%20antara-Lampiran.pdf>
