# Supplementary material for: Understanding Menstrual Irregularities in Adolescents: Key Factors and Their Role in Achieving Sustainable Development Goals
Source: Research Square preprint supplement (doi:10.21203/rs.3.rs-5538953/v1), 2025-04-23
Supplement: Supplementary file 2 [file f8d5aa08b95e2e236cd93687.docx]

**Questionnaire of Beck Depression Inventory – II**

| Name: | | Marital Status : (married/not yet married)* |
| --- | --- | --- |
| Age: years old | Religion: | Gender: (Male/Female) * |
| Occupation: | | Educational level: |

*Mark the ones that are not needed.

Instructions: The questionnaire below is divided into 21 statement categories. Please carefully read each group of statements, and then select one statement from each group that best characterizes your sentiments throughout the previous two weeks, including today. Circle the number next to the statement you've chosen. If multiple statements in a group feel the same way, circle the one with the most similarities. Ensure you do not select more than one item from each category, including statements 16 (Changes in sleep habits) and 18 (Changes in appetite).

| 1. **Sadness**   0. I don't feel sad.  1. I feel sad most of the time.  2. I feel sad all the time.  3. I feel so sad that it's unbearable. | 1. **Failures in the past**   0. I don't feel like a failure.  1. I have failed more than I should.  2. I had a lot of failures in the past.  3. I feel like I have failed (really failed). |
| --- | --- |
| 1. **Pessimistic**   0. I have no doubts about my future.  1. I feel more doubtful about my future than usual.  2. I feel like things are not going well for me.  3. I feel like my future is hopeless and will only get worse. | **4. Reduction in enthusiasm**  0. I get pleasure from the things I do.  1. I don't enjoy things as much as I used to.  2. I get very little pleasure from the things I used to enjoy.  3. I get no pleasure at all from the things I used to enjoy. |
| 1. **Feeling guilty**   0. I don't feel guilty at all.  1. I feel guilty about many things I have done or should have done.  2. I feel guilty often.  3. I feel guilty all the time. | 1. **Self-critism**   0. I don't criticize or blame myself more than usual.  1. I criticize myself more than usual.  2. I criticize myself for everything I do wrong.  3. I blame myself for everything bad that happens. |
| 1. **Feeling punished**   0. I don't feel like I'm being punished.  1. I feel that I might be punished.  2. I am sure that I will be punished.  3. I feel that I am being punished. | 1. **Suicidal Thoughts or Desires**   0. I don't think about killing myself.  1. I think about killing myself, but I won't do it.  2. I want to kill myself.  3. I would kill myself if I had the chance. |
| 1. **Hate myself**   0. I don't feel disappointed in myself.  1. I lost confidence in myself.  2. I feel disappointed in myself.  3. I hate myself. | 1. **Crying habits**   0. I don't cry as much as I used to.  1. I cry more often than I used to.  2. I cry even over small things.  3. I feel like crying but I can't. |

| 1. **Anxiety**   0. I feel less anxious or stressed than I used to. 1. I feel more anxious or stressed than I used to. 2. I am so stressed and anxious that I have trouble sitting still. 3. I am so anxious that I must always move. | 1. **Feeling unworthy**   0. I feel worthy. 1. I feel less worthy and useless than usual. 2. I feel more unworthy than other people. 3. I feel completely unworthy. |
| --- | --- |
| 1. **Loss of interest**   0. I have not lost interest in relationships with other people or activities. 1. I am less interested in relationships with other people or things than I used to be. 2. I have lost almost all interest in relationships with other people or things. 3. I have no interest in anything. | 1. **Powerless**   0. I have the power I usually have.  1. I have less power than I should have.  2. I don't have enough power to do much.  3. I don't have enough power to do anything. |
| 1. **Difficulty in making decisions**   0. I have the ability to make decisions as I normally do. 1. I have a little more difficulty making decisions than usual. 2. I have more difficulty making decisions than usual. 3. I struggle greatly with decision-making. | 1. **Changes in sleeping patterns** 2. I haven't experienced any changes in my sleep patterns.   1a. I sleep more than usual.  1b. I sleep less than usual.  2a. I slept much longer than usual.  2b. I slept much less than usual.  3a. I sleep most of the day. 3b. I wake up 1–2 hours early and can't get back to sleep. |
| 1. **Get angry easily**   0. I am not as irritable as I used to be. 1. I am more irritable than I used to be.  2. I get angry much more easily than usual. 3. My anger is constant. | 1. **Fatigue** 2. I am no more tired or fatigued than usual. 3. I get tired or fatigued more easily than usual.   2. I feel too tired or exhausted to do most of the things I usually do. 3. I am too tired or exhausted to do almost anything I usually do. |
| 1. **Perubahan selera makan**   0. My appetite is no different (no worse) than usual.  1a. My appetite is less than usual.  1b. My appetite is bigger than usual.  2a. I am experiencing a significant decrease in my appetite. 2b. My appetite is significantly larger than usual.  3a. I have no appetite at all. 3b. I desire constant food intake. | 1. **Loss of sexual desire**   0. I have not noticed any change in my sexual desire. 1. I am experiencing less sexual desire than usual. 2. My interest in sexual activity has significantly decreased. 3. My sexual desire has disappeared completely. |
| **19. Difficulty concentrating**  0. I am able to concentrate as well as usual. 1. I am unable to concentrate as well as usual. 2. I have a difficult time keeping my mind focused on one thing for a long period of time. 3. I feel like I am unable to concentrate on anything. | |

**Please cite as**: Ginting, H., Näring, G., van der Veld, W. M., Srisayekti, W., & Becker, E. S. (2013). Validating the Beck Depression Inventory-II in Indonesia’s general population and coronary heart disease patients. *International Journal of Clinical and Health Psychology, 13*(3)*,* 235-242. <https://www.sciencedirect.com/science/article/pii/S1697260013700280>
